# Supplementary material
Source: PubMed Central journal article supplement (PMC6416436)
Supplement: supp_RA118.005103_139740_1_supp_264093_pl0m0l.pdf [file supp_RA118.005103_139740_1_supp_264093_pl0m0l.pdf]

SUPPLEMENTAL INFORMATION:

Bile acid analogues are activators of Pyrin inflammasome

**Irina Alimov<sup>1</sup>, Suchithra Menon<sup>1</sup>, Nadire Cochran<sup>1</sup>, Rob Maher<sup>1</sup>, Qiong Wang<sup>1</sup>, John Alford<sup>1</sup>, John B. Concannon<sup>1</sup>, Zinger Yang<sup>1</sup>, Edmund Harrington<sup>1</sup>, Luis Llamas<sup>1</sup>, Alicia Lindeman<sup>1</sup>, Gregory Hoffman<sup>1</sup>, Tim Schuhmann<sup>2</sup>, Carsten Russ<sup>1</sup>, John Reece-Hoyes<sup>1</sup>, Stephen M. Canham<sup>1\*</sup>, Xinming Cai<sup>1,3\*</sup>**

<sup>1</sup> Novartis Institutes for Biomedical Research, 181 Massachusetts Avenue, Cambridge, MA 02139, USA

<sup>2</sup> Novartis Institute for Biomedical Research, Novartis Pharma AG, Forum 1 Novartis Campus, 4056 Basel, Switzerland

<sup>3</sup>Present address: Sanofi US, 270 Albany Street, Cambridge, MA 02139, USA

**Supplemental Figure 1.** Primary bile acids such as Taurocholic acid (TCA), Taurochenodeoxycholic acid (TCDA), and Lithocholic acid (LA) do not activate the inflammasome pathway in PBMCs. PBMCs were primed with 0.1 ng/ml LPS overnight followed by compound treatment for 16 h and AlphaLISA detection of secreted levels of IL18 (A). Data presented is mean  $\pm$  SEM (n=3), \*p value <0.0001 (one-way ANOVA).

A.

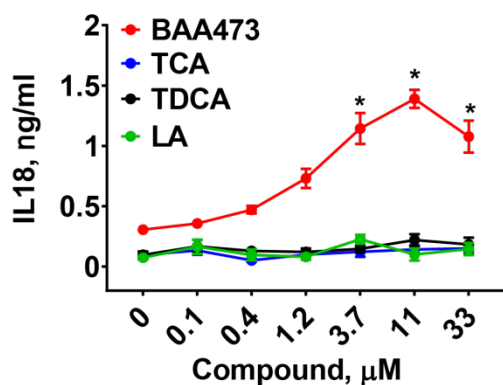

**Supplemental Figure 2.** Hypothetical two-step transformation synthesis of BAA485 and BAA473 from DCA by gut bacteria.

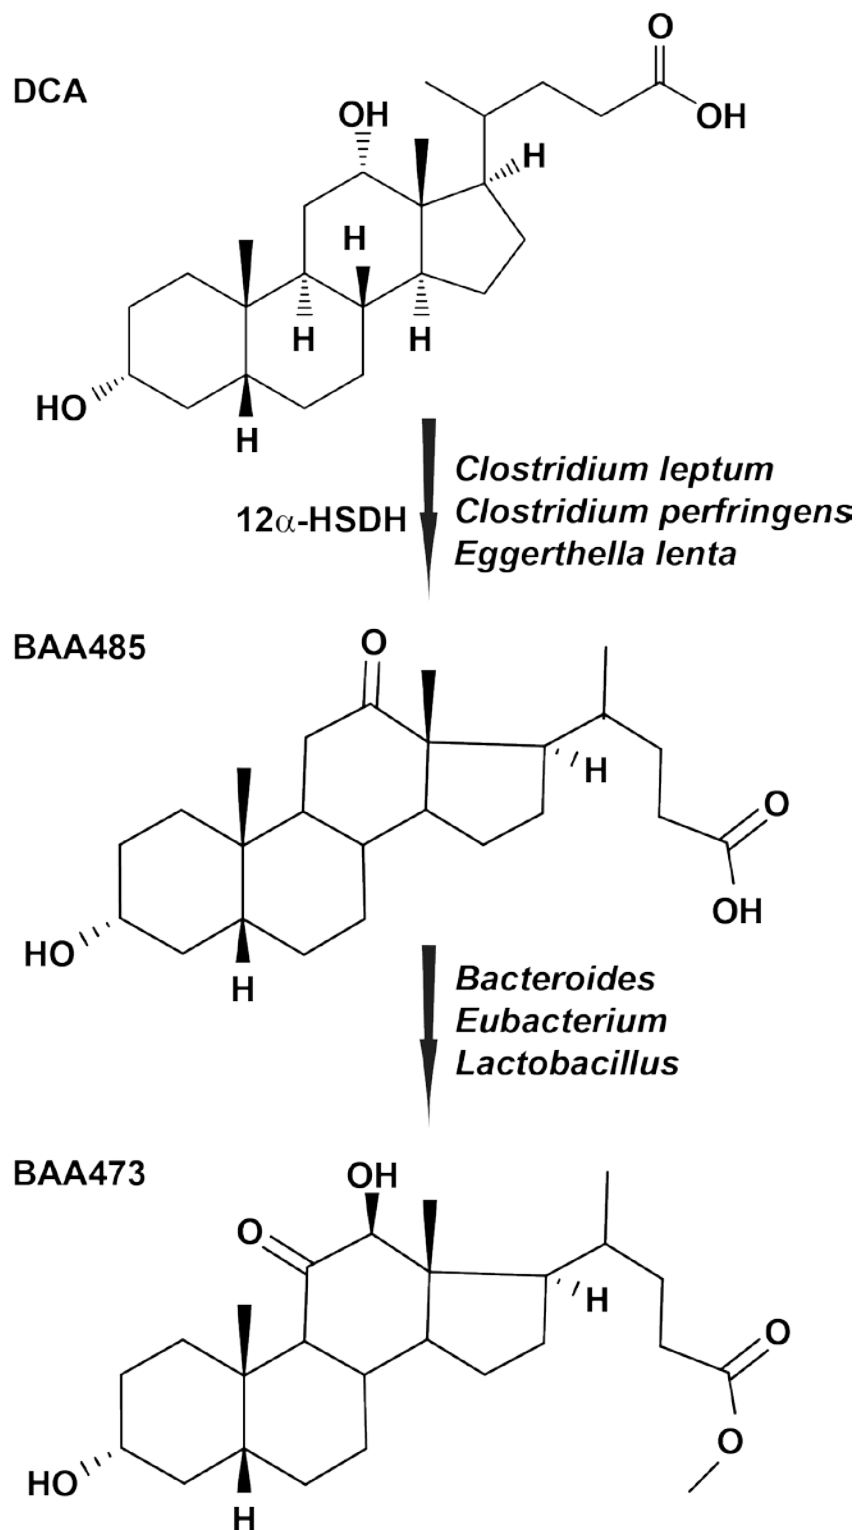

**Supplemental Figure 3.** More detailed annotation of the BAA473 CRISPR screen which also appears as Figure 4D. Gene-centric visualization is shown of average log<sub>2</sub> fold change versus significance score. Inositol phosphate signaling pathway and IFN transcription factor complex hits are highlighted in green.

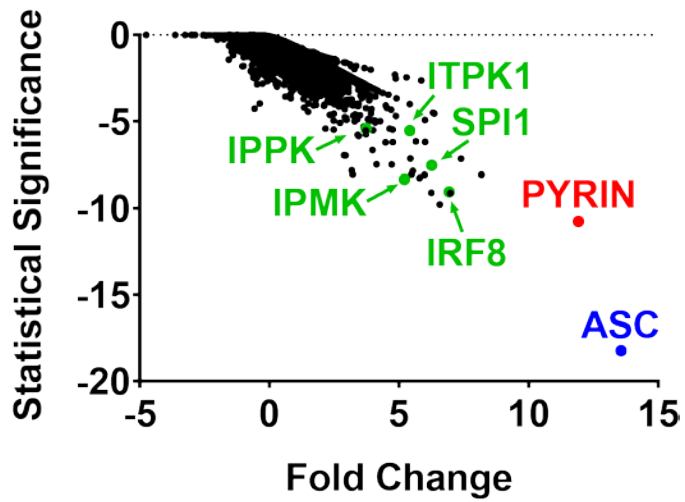

**Supplemental Table 1.** Enriched gene sets identified by MSigDB analysis in the BAA473 CRISPR screen.

| GO Biological Process                  | Genes                                                                        | Number of Genes<br>in Gene Set | P-value<br>(-Log 10) |
|----------------------------------------|------------------------------------------------------------------------------|--------------------------------|----------------------|
| Inositol Trisphosphate Kinase Activity | <i>IPMK, ITPK1</i>                                                           | 11                             | 4.1                  |
| Inositol Phosphate Metabolic Process   | <i>IPPK, IPMK, ITPK1</i>                                                     | 56                             | 4.4                  |
| Alcohol Metabolic Process              | <i>CEBPA, IPPK, CLN3, IPMK, ITPK1</i>                                        | 348                            | 4.2                  |
| Defense Response To Other Organism     | <i>PYCARD, IRF8, SPN, EIF2S1, SLC35C1, REP15</i>                             | 505                            | 4.5                  |
| Immune System Development              | <i>SPI1, SIN3A, NCOA6, CEBPA, IRF8, CDC42, SPN</i>                           | 582                            | 5.2                  |
| Regulatory Region Nucleic Acid Binding | <i>CXXC1, SPI1, RBBP5, SIN3A, CEBPA, IRF8, MEF2D</i>                         | 818                            | 4.3                  |
| Regulation of Immune System Process    | <i>PAXIP1, SPI1, SIN3A, PHB2, PYCARD, CDC42, SPN, EIF2S1, SLC35C1, REP15</i> | 1403                           | 5.2                  |

**Supplemental Table 2.** Individual sgRNAs sequences selected for validation experiments according to sgRNA sequences used in the study.

| Gene          | gRNA      | sgRNA sequence       |
|---------------|-----------|----------------------|
| <i>MEFV</i>   | Pyrin-1   | GCAGCTGGACCTGCTTCAGG |
| <i>MEFV</i>   | Pyrin-2   | GGTGCCAGAACTGCCTCG   |
| <i>PYCARD</i> | ASC-1     | GAACTTCTTGAGCTCCTCGG |
| <i>PYCARD</i> | ASC-2     | GTTCAAGCTGAAGCTGCTGT |
| CTRL0002      | Control-1 | GACCGGAACGATCTCGCGTA |
| EGFP          | Control-2 | GGGCGAGGAGCTGTTACCG  |
